# Supplementary figures and images for: Heterodimerization of AML1/ETO with CBFβ is required for leukemogenesis but not for myeloproliferation
Source: PubMed Central journal article supplement — Leukemia. 2017 Apr 25;31(11):2491–502. doi: 10.1038/leu.2017.105 (PMC5668496; doi:10.1038/leu.2017.105), 2017-04-25

**A**

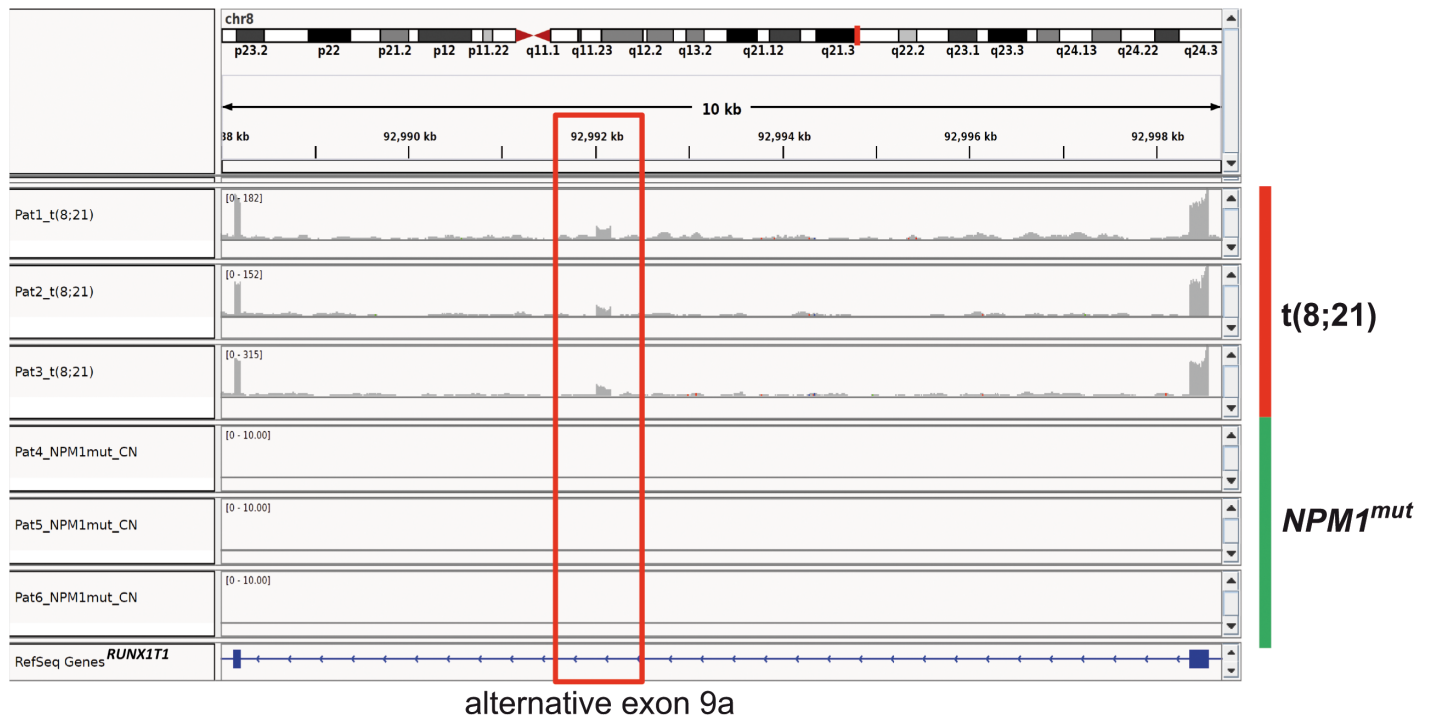

**B**

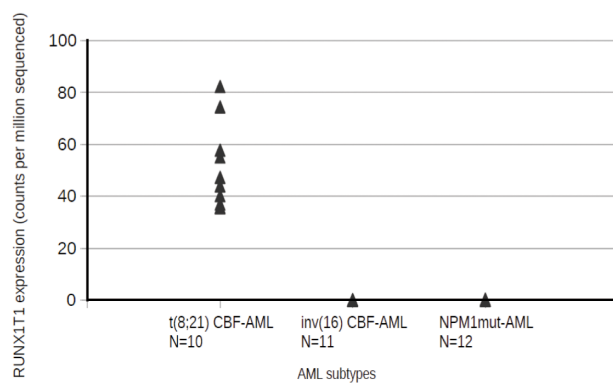

**C**

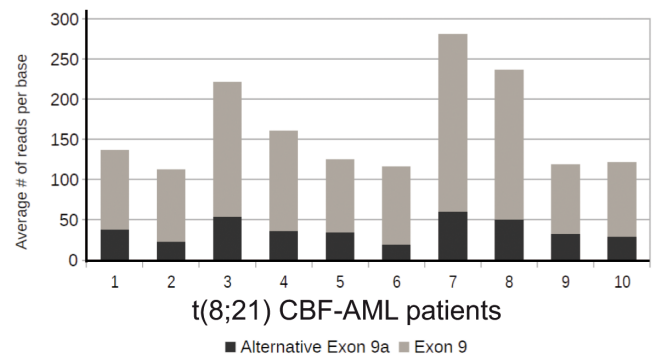

**D**

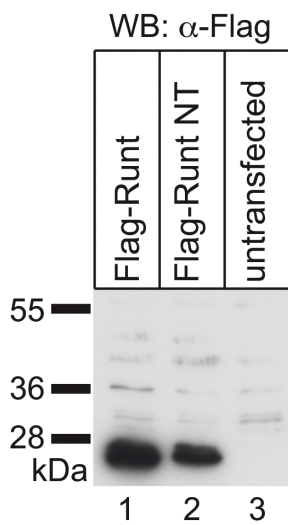

**E**

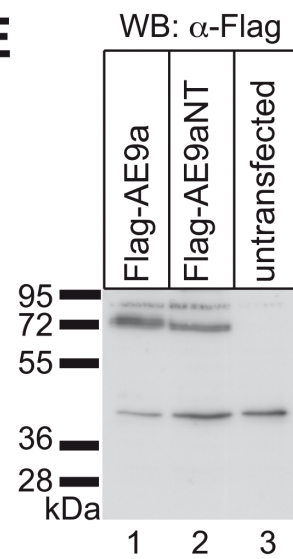

Supplement: leu2017105x2.pdf [file leu2017105x2.pdf]

# Thiel\_Figure S2

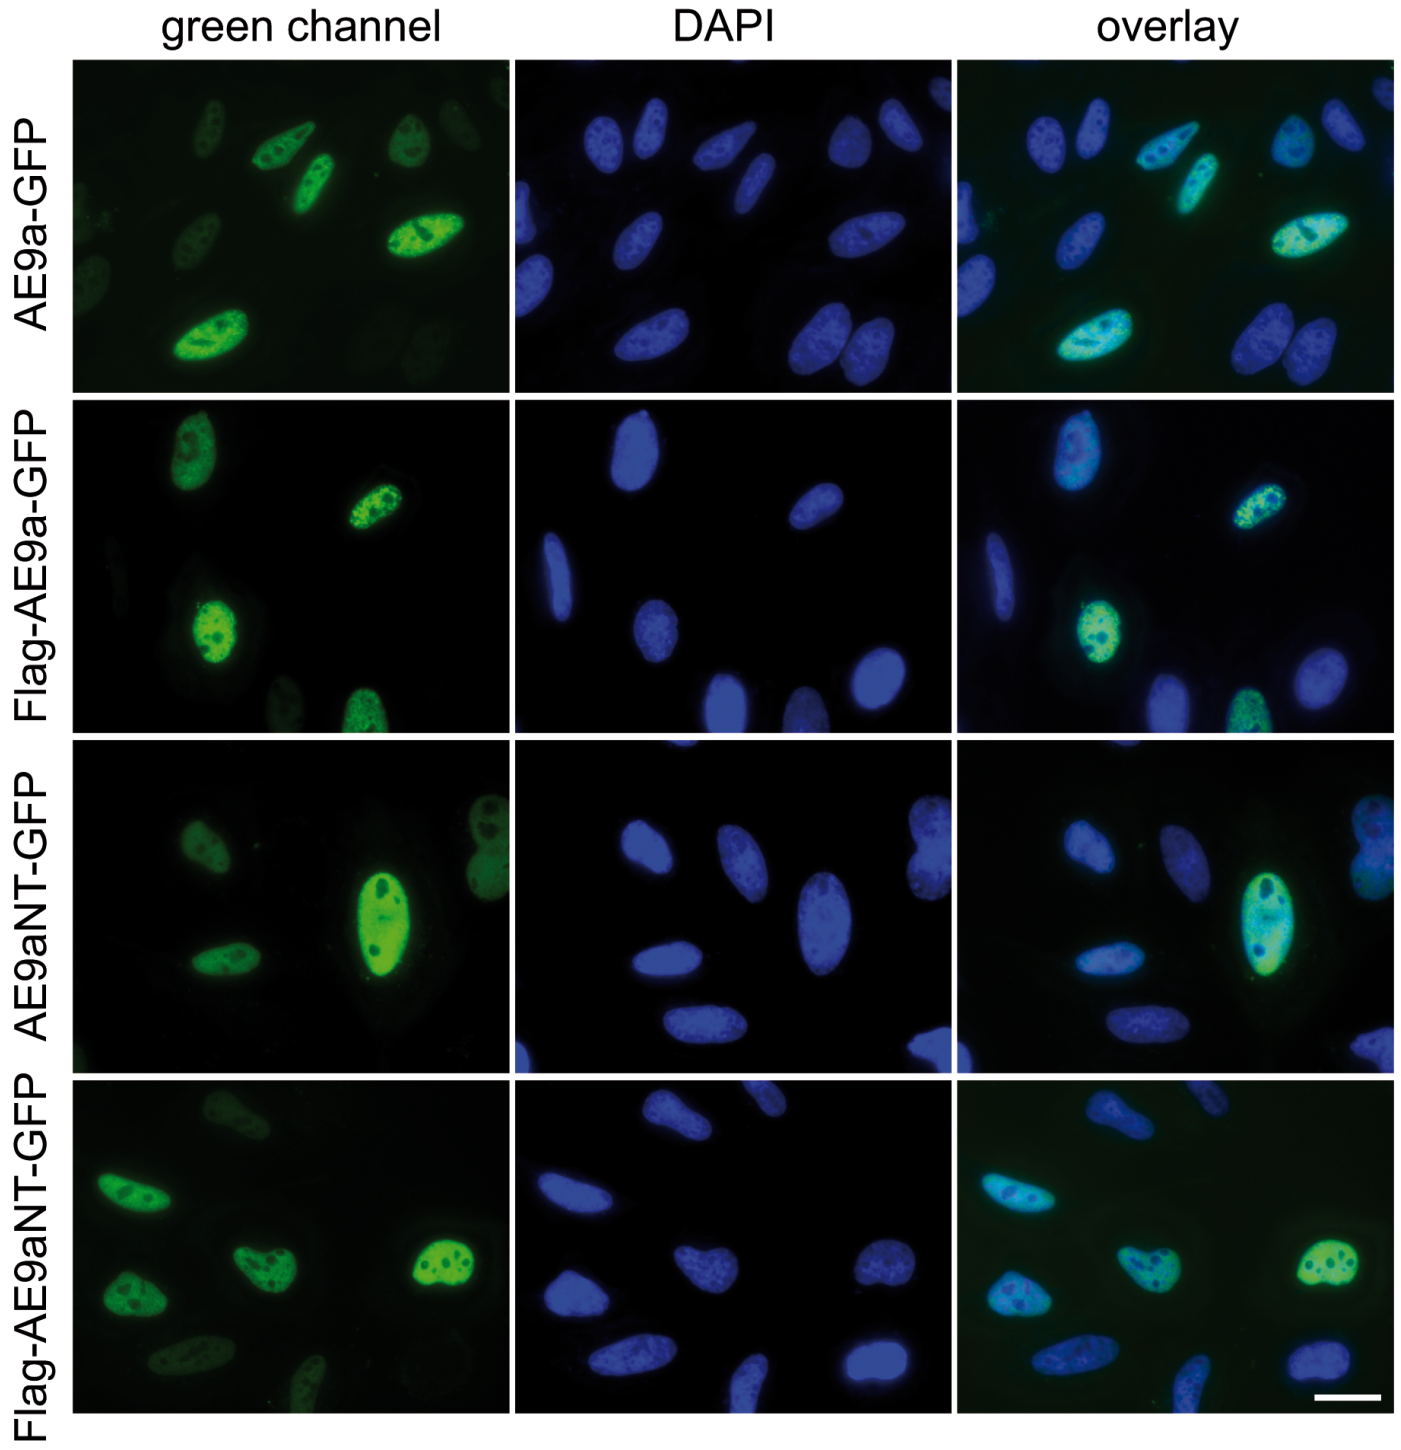

Supplement: leu2017105x3.pdf [file leu2017105x3.pdf]

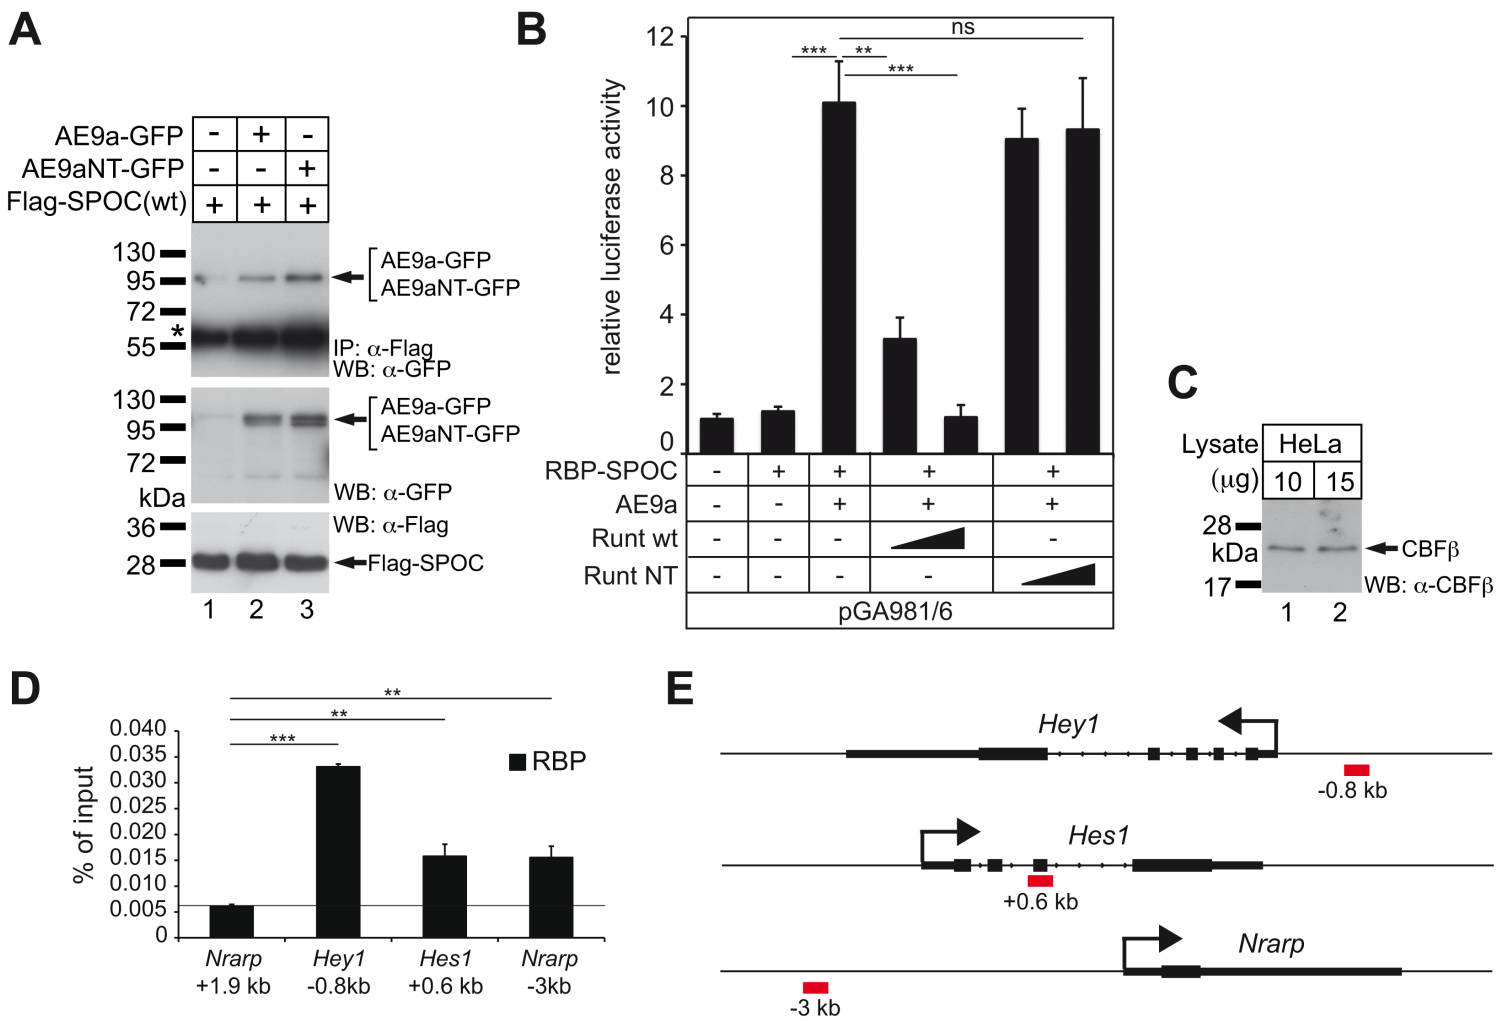

Supplement: leu2017105x4.pdf [file leu2017105x4.pdf]

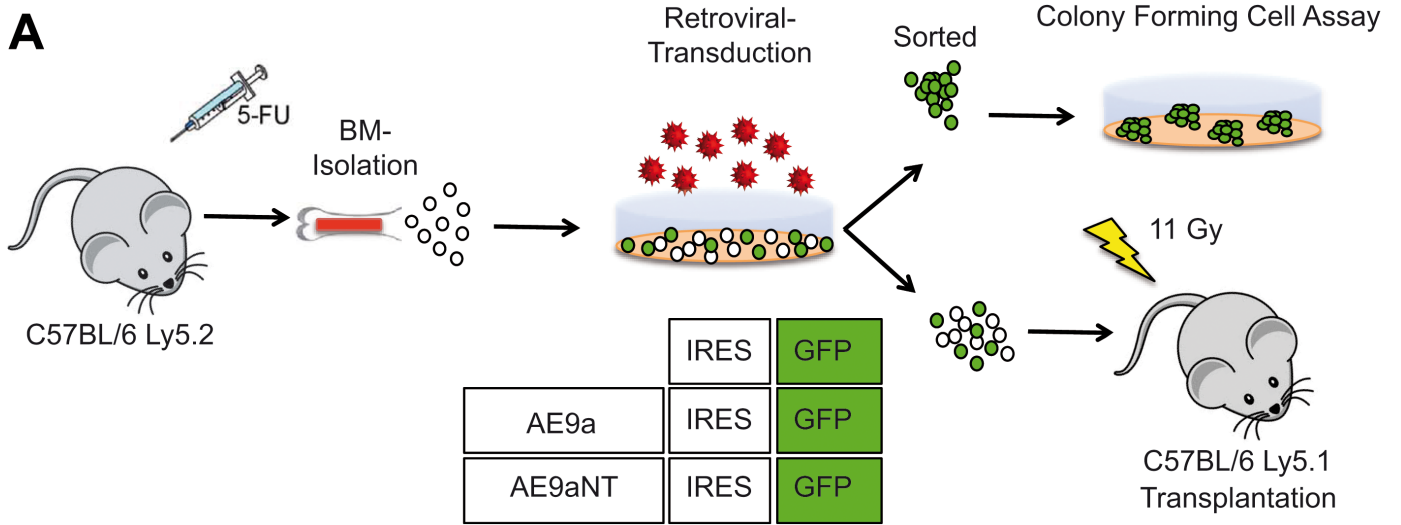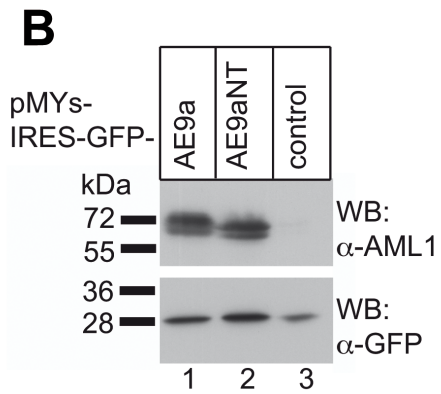

Supplement: leu2017105x5.pdf [file leu2017105x5.pdf]

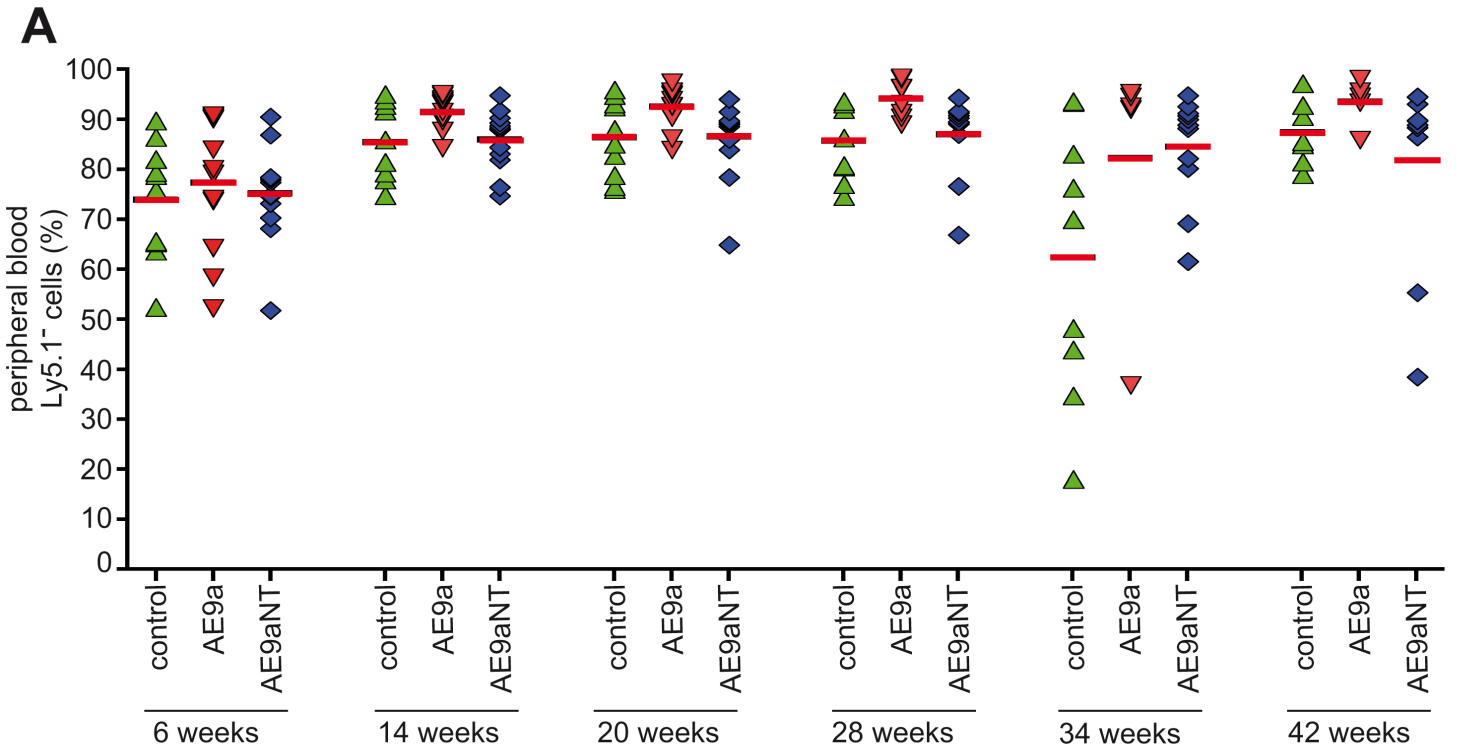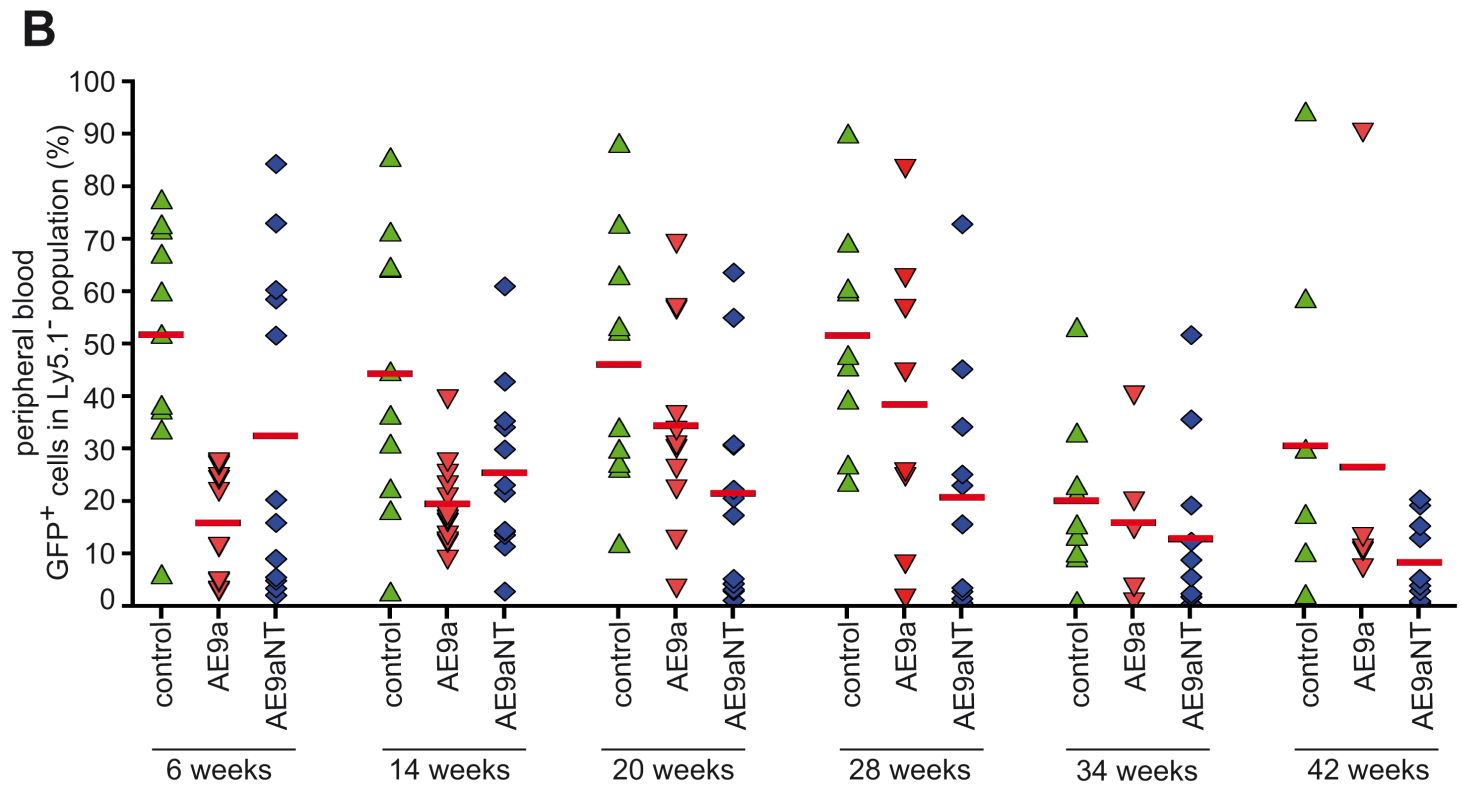

Supplement: leu2017105x6.pdf [file leu2017105x6.pdf]

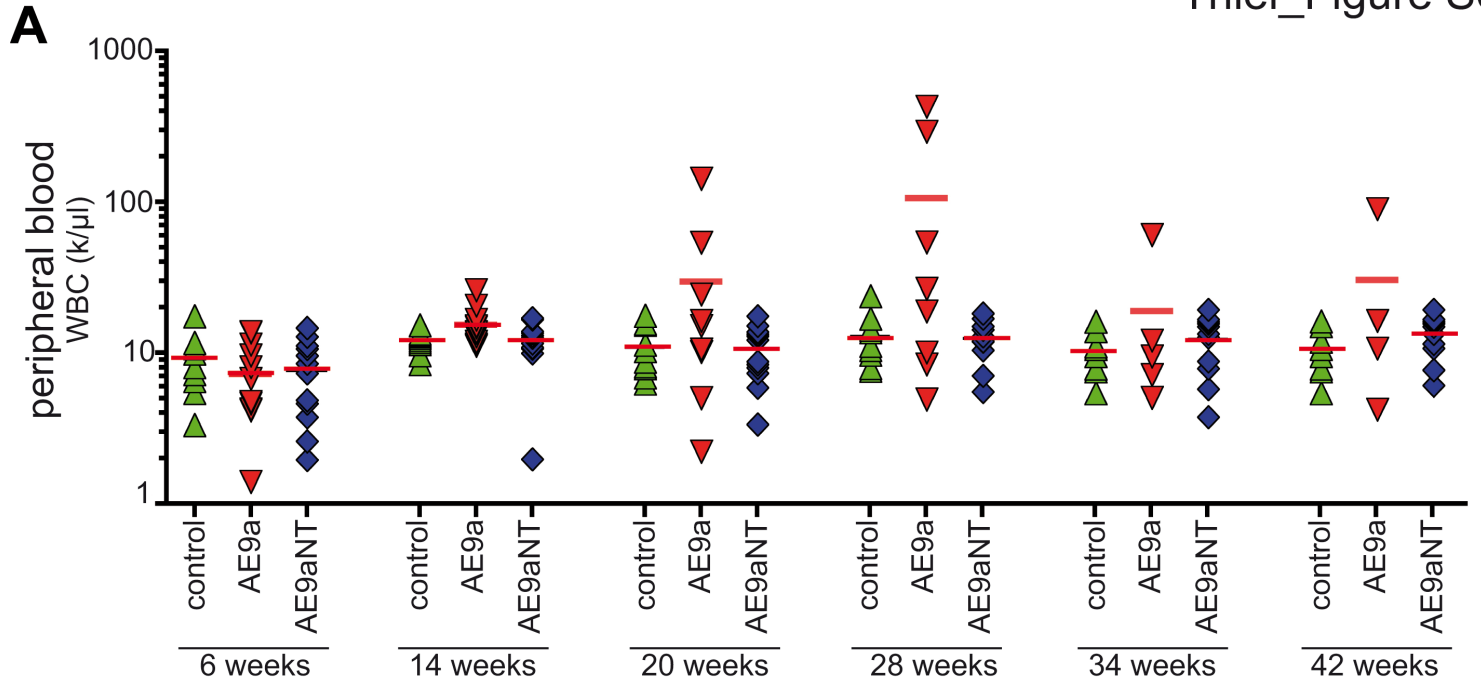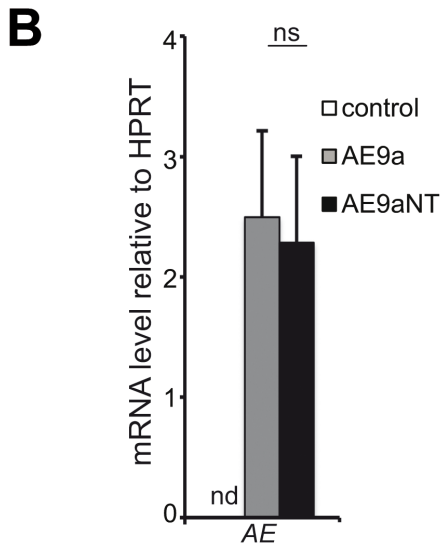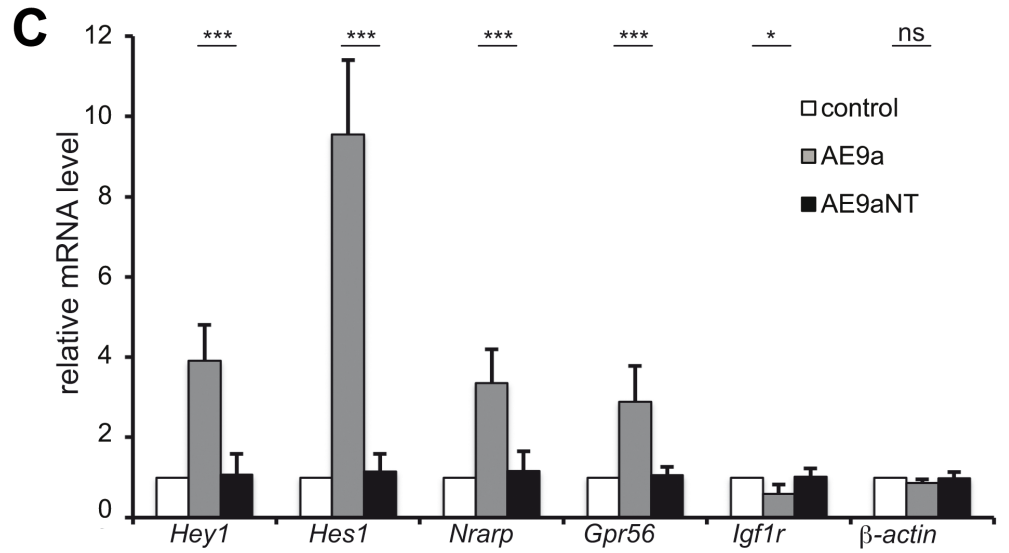

Supplement: leu2017105x7.pdf [file leu2017105x7.pdf]

**A**

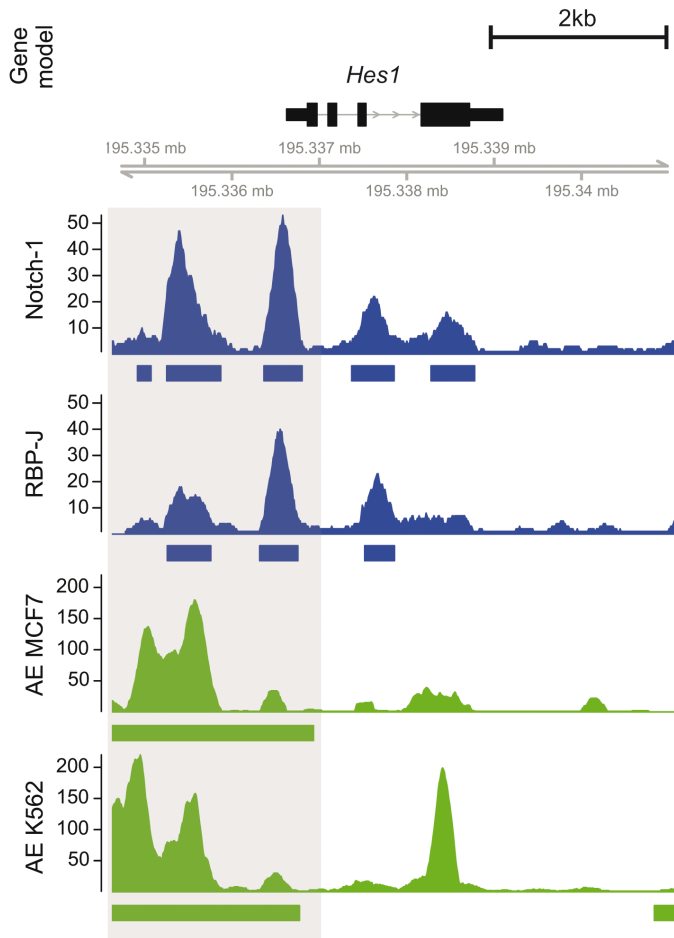

**B**

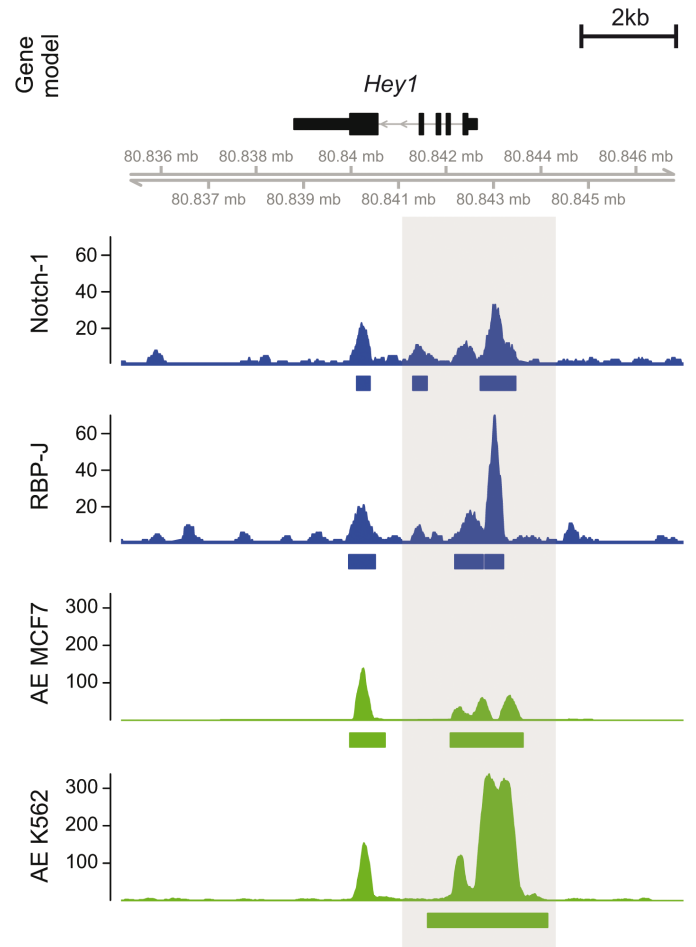

Supplement: leu2017105x8.pdf [file leu2017105x8.pdf]
